# Supplementary material for: Platinum phosphinothiolato hydride complexes: synthesis, structure and evaluation as tin-free hydroformylation catalysts
Source: Royal Society of Chemistry journal article supplement (doi:10.1039/c5dt04107d), 2016-01-01
Supplement: c5dt04107d1.pdf [file c5dt04107d1.pdf]

# SUPPLEMENTARY ELECTRONIC INFORMATION for Platinum phosphinothiolato hydride complexes: synthesis, structure and evaluation as tin-free hydroformylation catalysts.

Julio Real,<sup>\*a</sup> Esther Prat-Gil,<sup>a</sup> Montserrat Pagès-Barenys,<sup>a</sup> Alfonso Polo,<sup>b</sup> Joan F. Piniella<sup>c</sup> and Ángel Álvarez-Larena<sup>c</sup>

<sup>a</sup>Departament de Química, Universitat Autònoma de Barcelona, 08193 Bellaterra, Barcelona, Spain.

<sup>b</sup>Departament de Química, Universitat de Girona. Campus de Montilivi, 17071 Girona, Spain.

<sup>c</sup>Servei de Difracció de Raigs-X, Universitat Autònoma de Barcelona, 08193 Bellaterra, Barcelona, Spain.

## Contents

Figure S1. <sup>1</sup>H NMR (250 MHz, CD<sub>2</sub>Cl<sub>2</sub>, rt) of *trans*-**1**

Figure S2. <sup>1</sup>H NMR (250 MHz, CD<sub>2</sub>Cl<sub>2</sub>, rt) of *trans*-**1** and *cis*-**1**

Figure S3. <sup>31</sup>P{<sup>1</sup>H} NMR (101 MHz, CD<sub>2</sub>Cl<sub>2</sub>, rt) of *trans*-**1**

Figure S4. IR (KBr) of *trans*-**1**

Table S1. Crystallographic Data for *trans*-**1**, *trans*-**2** and *cis*-**2**·CH<sub>2</sub>Cl<sub>2</sub>

Figure S5. Numbering scheme for *trans*-**1**

Figure S6. Numbering scheme for *trans*-**2**

Figure S7. Numbering scheme for *cis*-**2**

Table S2. Selected Distances [Å] and Angles [deg] for *trans*-**1**, *trans*-**2** and *cis*-**2**·CH<sub>2</sub>Cl<sub>2</sub>

Table S3. Crystallographic data for isostructural *trans*- and *cis*-[M(sarp)<sub>2</sub>] (M= Ni, Pd, Pt) bischelate complexes from the literature and this work.

Table S4. Distances to the least squares plane defined by Pt, S, P1 and P2, in *trans*-**1**. Calculated using the program PLATON, values in Å.

Table S5. Distances to the plane defined by Pt, S and P, in *trans*-**2**. Calculated using the program PLATON, values in Å. Pt is at the inversion center.

Table S6. Distances to the least squares plane defined by Pt, S1, S2, P1 and P2, in *cis*-**2**·CH<sub>2</sub>Cl<sub>2</sub>. Calculated using the program PLATON, values in Å

Figure S1.  $^1\text{H}$  NMR (250 MHz,  $\text{CD}_2\text{Cl}_2$ , rt) of *trans*-1 in the hydride region, solution was 30 min. old

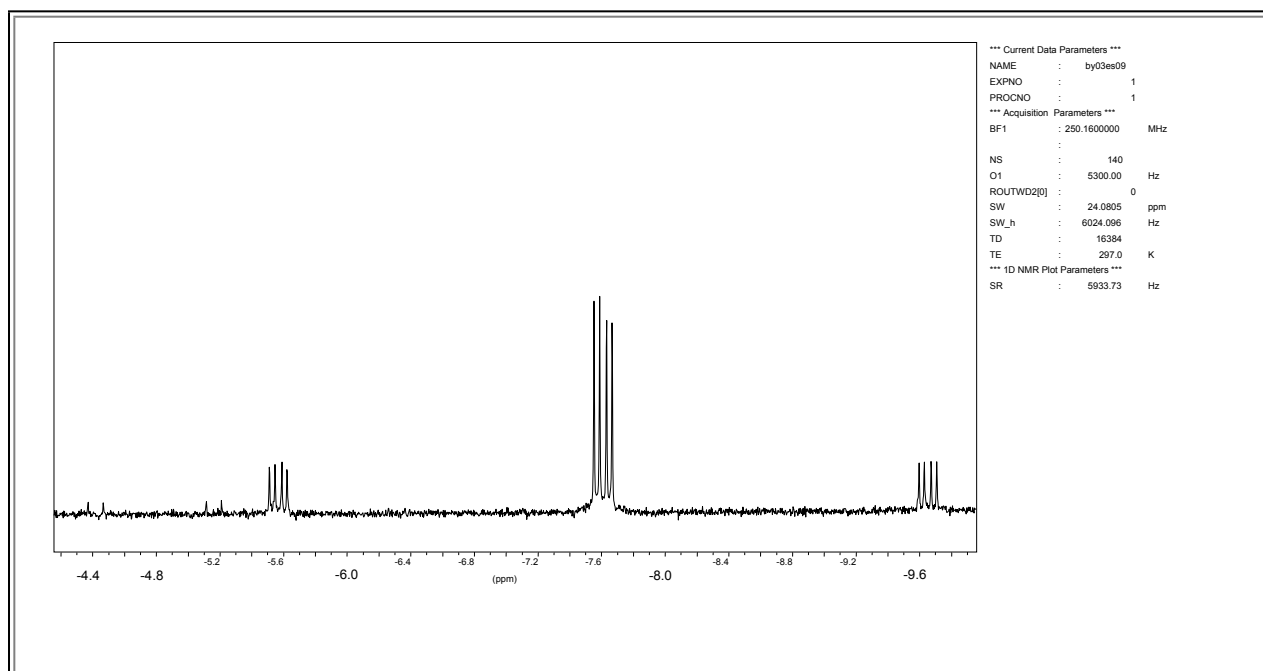

Figure S2.  $^1\text{H}$  NMR (250 MHz,  $\text{CD}_2\text{Cl}_2$ , rt) of *trans*-1 and *cis*-1 in the hydride region, solution was 24h old

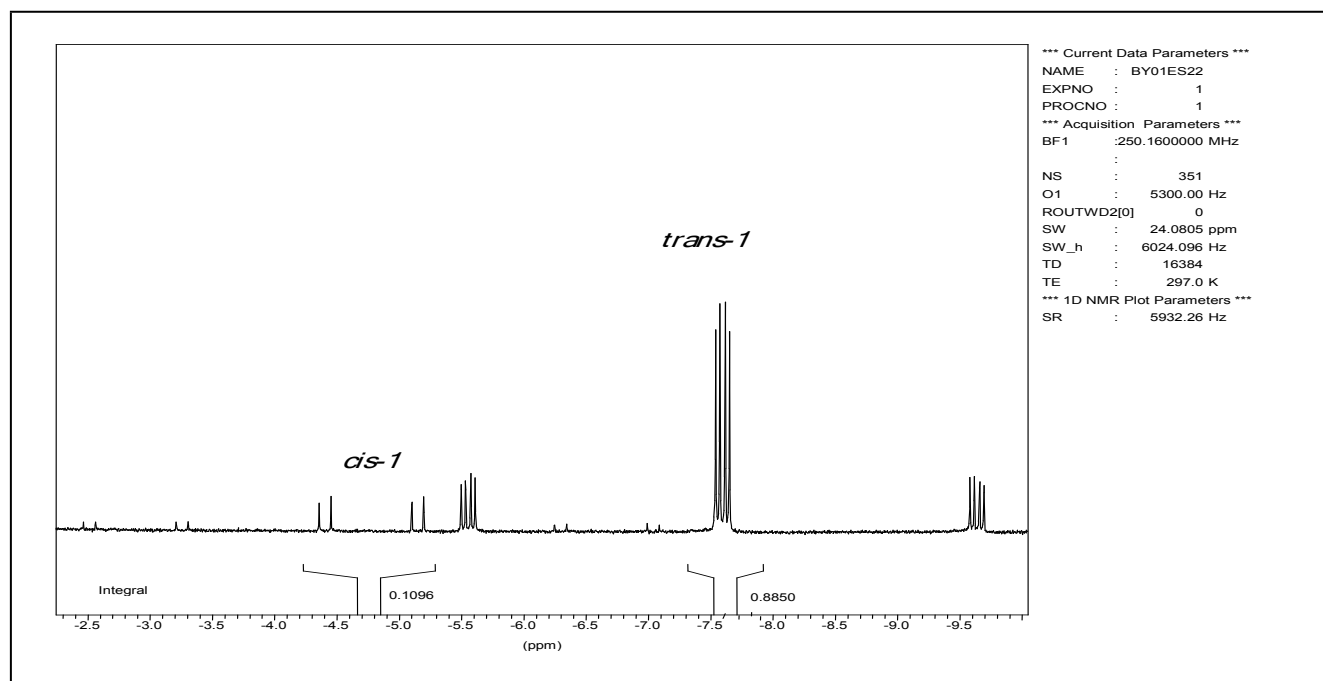

Figure S3.  $^{31}\text{P}\{^1\text{H}\}$  NMR (101 MHz,  $\text{CD}_2\text{Cl}_2$ , rt) of *trans*-**1**, solution was 30 min. old

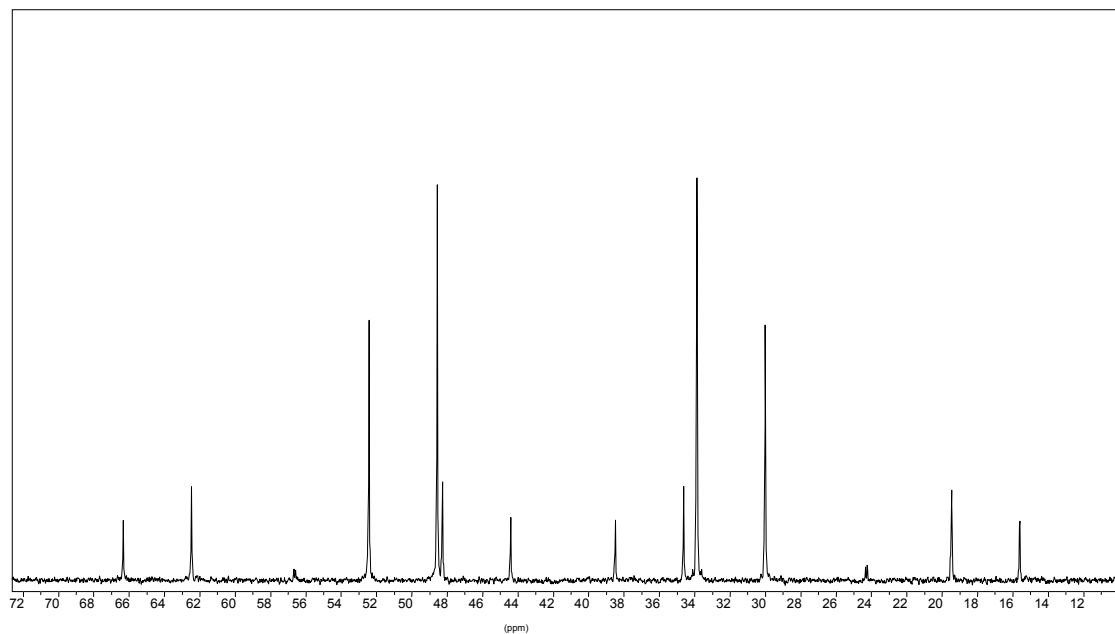

Figure S4. IR (KBr) of *trans*-**1**

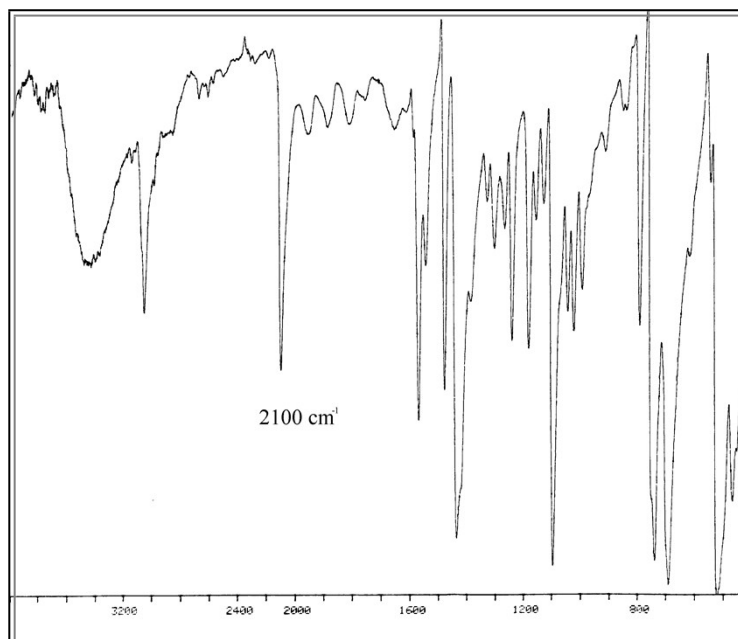

**Table S1.** Crystallographic Data for *trans-1*, *trans-2* and *cis-2*·CH<sub>2</sub>Cl<sub>2</sub>

|                                            | <i>trans-1</i>                                     | <i>trans-2</i>                                                  | <i>cis-2</i> ·CH <sub>2</sub> Cl <sub>2</sub>                                   |
|--------------------------------------------|----------------------------------------------------|-----------------------------------------------------------------|---------------------------------------------------------------------------------|
| empirical formula                          | C <sub>36</sub> H <sub>30</sub> P <sub>2</sub> PtS | C <sub>36</sub> H <sub>28</sub> P <sub>2</sub> PtS <sub>2</sub> | C <sub>37</sub> H <sub>30</sub> Cl <sub>2</sub> P <sub>2</sub> PtS <sub>2</sub> |
| fw                                         | 751.69                                             | 781.73                                                          | 866.66                                                                          |
| <i>T</i> , °C                              | 20(2)                                              | 20(2)                                                           | 20(2)                                                                           |
| $\lambda$ , Å                              | 0.71069                                            | 0.71069                                                         | 0.71069                                                                         |
| space group                                | P 2 <sub>1</sub> /n                                | P 2 <sub>1</sub> /c                                             | P 2 <sub>1</sub> /n                                                             |
| <i>a</i> , Å                               | 9.088(4)                                           | 9.7696(8)                                                       | 15.528(10)                                                                      |
| <i>b</i> , Å                               | 15.028(2)                                          | 12.9072(11)                                                     | 9.512(5)                                                                        |
| <i>c</i> , Å                               | 23.005(3)                                          | 12.8003(11)                                                     | 22.462(11)                                                                      |
| $\beta$ , deg                              | 95.87(2)                                           | 110.244(8)                                                      | 91.97(5)                                                                        |
| <i>V</i> , Å <sup>3</sup>                  | 3125.4(15)                                         | 1514.4(2)                                                       | 3316(3)                                                                         |
| <i>Z</i>                                   | 4                                                  | 2                                                               | 4                                                                               |
| $\rho_{\text{calc}}$ , g cm <sup>-3</sup>  | 1.597                                              | 1.714                                                           | 1.736                                                                           |
| $\mu$ , cm <sup>-1</sup>                   | 46.8                                               | 49.0                                                            | 46.4                                                                            |
| $R(F_o)$ [ $I > 2\sigma(I)$ ] <sup>a</sup> | 0.0538                                             | 0.0519                                                          | 0.0798                                                                          |
| $R_w(F_o^2)$ (all data) <sup>b</sup>       | 0.1320                                             | 0.0886                                                          | 0.2003                                                                          |
| <i>a</i> , <i>b</i> <sup>b</sup>           | 0.0805, 0                                          | 0.0132, 5.72                                                    | 0.1235, 0                                                                       |

$${}^a R(F_o) = \sum ||F_o| - |F_c|| / \sum |F_o|.$$

$${}^b R_w(F_o^2) = [\sum w(F_o^2 - F_c^2)^2 / \sum w(F_o^2)^2]^{1/2}$$

$$w = 1/[\sigma^2(F_o^2) + aP + (bP)^2] \quad \text{where } P = [F_o^2 + 2F_c^2]/3$$

Figure S5. Numbering scheme for *trans-1*

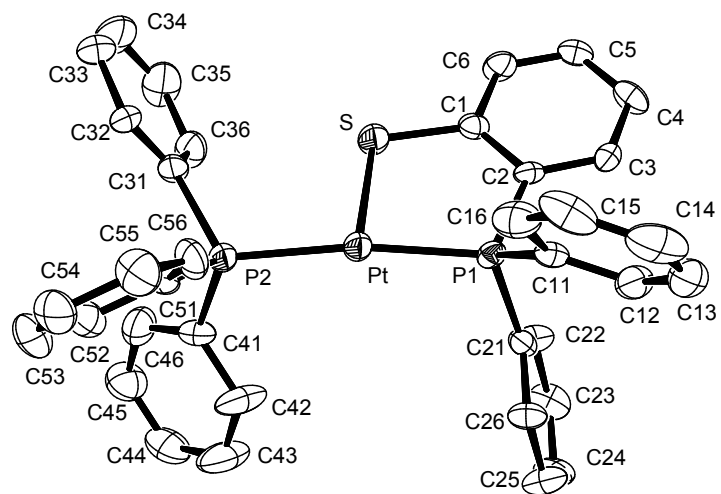

Figure S6. Numbering scheme for *trans-2*

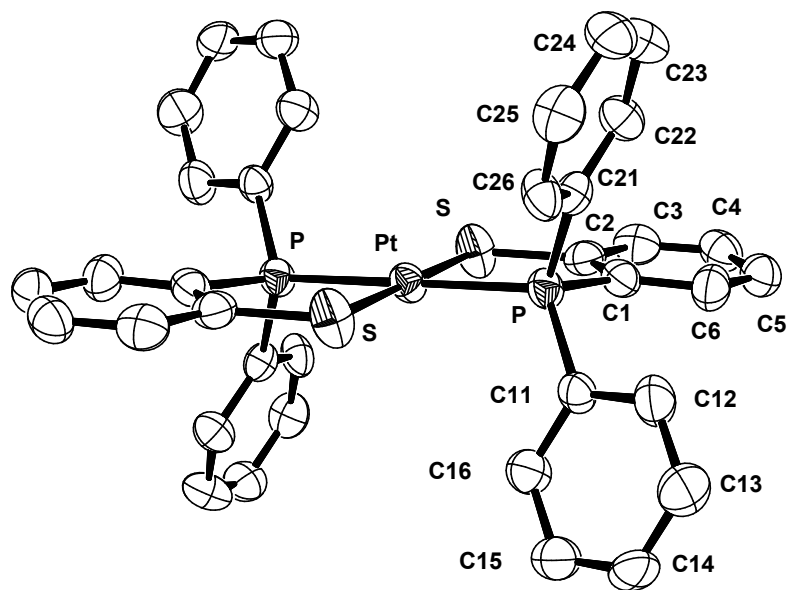

Figure S7. Numbering scheme for *cis-2*

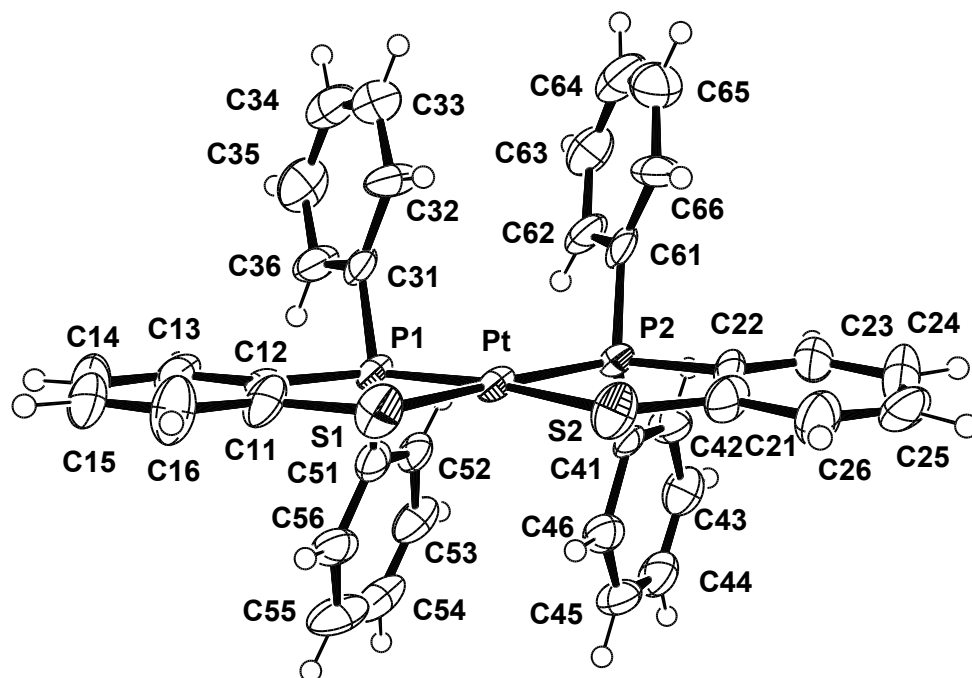

**Table S2.** Selected Distances [Å] and Angles [deg] for *trans-1*, *trans-2* and *cis-2*·CH<sub>2</sub>Cl<sub>2</sub>

| <i>trans-1</i>             |          |          |          |
|----------------------------|----------|----------|----------|
| Pt-S                       | 2.357(3) | C2-C3    | 1.388(8) |
| Pt-P1                      | 2.243(3) | C3-C4    | 1.371(8) |
| Pt-P2                      | 2.278(3) | C4-C5    | 1.383(8) |
| S-C1                       | 1.768(9) | C5-C6    | 1.374(8) |
| P1-C2                      | 1.822(8) | C6-C1    | 1.403(8) |
| C1-C2                      | 1.393(8) |          |          |
| S-Pt-P1                    | 86.91(9) | C3-C2-P1 | 124.1(6) |
| S-Pt-P2                    | 98.6(1)  | C1-C2-C3 | 120.0(8) |
| P1-Pt-P2                   | 171.6(1) | C2-C3-C4 | 122.2(8) |
| Pt-S-C1                    | 104.6(3) | C3-C4-C5 | 117.9(9) |
| S-C1-C6                    | 119.0(6) | C4-C5-C6 | 121.2(9) |
| S-C1-C2                    | 123.3(6) | C1-C6-C5 | 121.1(9) |
| Pt-P1-C2                   | 109.1(3) | C2-C1-C6 | 117.7(8) |
| C1-C2-P1                   | 115.9(6) |          |          |
| <i>trans-2</i>             |          |          |          |
| Pt-P                       | 2.293(2) | C2-C3    | 1.400(7) |
| Pt-S                       | 2.315(2) | C1-C6    | 1.398(7) |
| S-C2                       | 1.787(8) | C3-C4    | 1.379(7) |
| P-C1                       | 1.821(8) | C4-C5    | 1.390(8) |
| C1-C2                      | 1.388(7) | C5-C6    | 1.384(7) |
| P-Pt-S(chelate)            | 86.96(7) | C2-C1-C6 | 120.2(7) |
| P-Pt-S'(open) <sup>a</sup> | 93.04(7) | C1-C2-C3 | 118.2(7) |
| Pt-S-C2                    | 105.7(2) | C4-C3-C2 | 121.3(8) |
| Pt-P-C1                    | 107.5(2) | C5-C4-C3 | 120.4(8) |
| P-C1-C6                    | 123.0(6) | C6-C5-C4 | 118.6(8) |
| C2-C1-P                    | 116.7(5) | C1-C6-C5 | 121.1(8) |
| C3-C2-S                    | 119.4(6) |          |          |
| C1-C2-S                    | 122.4(6) |          |          |

<sup>a</sup> The platinum is at the inversion center, S' is related to S by  $-x, -y, -z$ .

| <i>cis-2</i> ·CH <sub>2</sub> Cl <sub>2</sub> |          |         |         |
|-----------------------------------------------|----------|---------|---------|
| Pt-P1                                         | 2.263(4) | C12-C13 | 1.42(2) |

|           |          |            |           |
|-----------|----------|------------|-----------|
| Pt-P2     | 2.249(4) | C13-C14    | 1.37(3)   |
| Pt-S1     | 2.313(5) | C14-C15    | 1.42(2)   |
| Pt-S2     | 2.326(4) | C15-C16    | 1.36(2)   |
| S1-C11    | 1.77(1)  | C21-C22    | 1.38(2)   |
| S2-C21    | 1.75(2)  | C21-C26    | 1.40(2)   |
| C12-P1    | 1.82(1)  | C22-C23    | 1.37(2)   |
| C22-P2    | 1.83(1)  | C23-C24    | 1.39(2)   |
| C11-C12   | 1.35(2)  | C24-C25    | 1.37(2)   |
| C11-C16   | 1.40(2)  | C25-C26    | 1.38(2)   |
|           |          |            |           |
| P1-Pt-S1  | 87.7(2)  | C11-C12-P1 | 119.5(11) |
| P2-Pt-S2  | 87.4(2)  | C13-C12-P1 | 119.6(11) |
| P2-Pt-P1  | 100.3(2) | C23-C22-P2 | 122.0(11) |
| S1-Pt-S2  | 84.7(2)  | C21-C22-P2 | 116.5(10) |
| P2-Pt-S1  | 172.0(2) | C12-C11-S1 | 121.4(11) |
| P1-Pt-S2  | 171.7(2) | C16-C11-S1 | 118.7(9)  |
| C11-S1-Pt | 105.4(6) | C22-C21-S2 | 123.0(11) |
| C22-P2-Pt | 167.7(5) | C26-C21-S2 | 118.2(9)  |
| C21-S2-Pt | 105.1(5) |            |           |
| C12-P1-Pt | 105.9(5) |            |           |



**Table S3.** Crystallographic data for isostructural *trans*- and *cis*-[M(sarp)<sub>2</sub>] (M= Ni, Pd, Pt) bischelate complexes from the literature and this work.<sup>a</sup>

|                                                     | <b>a</b>   | <b>b</b>    | <b>c</b>    | <b>β</b>   | Volume<br>(Å <sup>3</sup> ) | Observations                                                                  |
|-----------------------------------------------------|------------|-------------|-------------|------------|-----------------------------|-------------------------------------------------------------------------------|
| <i>trans</i> -[Ni(sarp) <sub>2</sub> ] <sup>b</sup> | 9.651(2)   | 12.971(8)   | 12.540(2)   | 110.46(2)  | 1470.7(11)                  | P2 <sub>1</sub> /c (ref. 2)                                                   |
| <i>trans</i> -[Pd(sarp) <sub>2</sub> ]              | 9.735(3)   | 12.865(3)   | 12.732(4)   | 110.41(2)  | 1494.5(7)                   | P2 <sub>1</sub> /c (ref. 3)                                                   |
| <i>trans</i> -[Pt(sarp) <sub>2</sub> ]              | 9.7696(8)  | 12.9072(11) | 12.8003(11) | 110.244(8) | 1514.4(2)                   | P2 <sub>1</sub> /c (this work)                                                |
| <i>cis</i> -[Pd(sarp) <sub>2</sub> ]                | 15.559(2)  | 9.5224(9)   | 22.563(3)   | 91.91(1)   | 3341.1(7)                   | P2 <sub>1</sub> /n, CH <sub>2</sub> Cl <sub>2</sub> solv. (ref. 4, 5)         |
| <i>cis</i> -[Pt(sarp) <sub>2</sub> ]                | 15.528(10) | 9.512(5)    | 22.462(11)  | 91.97(5)   | 3316(3)                     | P2 <sub>1</sub> /n, CH <sub>2</sub> Cl <sub>2</sub> solv. (this work, ref. 5) |

<sup>a</sup>Cell parameters in Å and degrees. In all *trans* complexes the metal is at the inversion center.

<sup>b</sup>Besides the monoclinic, green form, there is a triclinic, brown form for *trans*-[Ni(sarp)<sub>2</sub>],<sup>1</sup> but the *cis* isomer is unknown.

(1) Block, E.; Ofori-Okai, G.; Kang, H.; Zubieta, J. *Inorg. Chim. Acta* **1991**, *188*, 7.

(2) Kim, J.S.; Reibenspies, J.H.; Darensbourg, M.Y. *J. Am. Chem. Soc.* **1996**, *118*, 4115.

(3) Benefiel, A.; Roundhill, D.M.; Fultz, W.C.; Rheingold, A.L. *Inorg. Chem.* **1984**, *23*, 3316.

(4) Real, J.; Prat, E.; Polo, A.; Alvarez-Larena, A.; Piniella, J.F. *Inorg. Chem. Commun.* **2000**, *3*, 221.

(5) Canseco-González, D.; Gómez-Benítez, S.; Hernández-Ortega, S.; Toscano, R.A.; Morales-Morales, D. *J. Organomet. Chem.* **2003**, *679*, 101.

**Table S4.** Distances to the least squares plane defined by Pt, S, P1 and P2, in *trans-1*. Calculated using the program PLATON, values in Å.

| Atoms defining the<br>l.s. plane | distances to the<br>l.s. plane | carbon atoms of<br>the sp ligand | distance to the<br>l.s. plane |
|----------------------------------|--------------------------------|----------------------------------|-------------------------------|
| Pt                               | -0.082 (1)                     | C1                               | +0.010 (7)                    |
| S                                | +0.004 (3)                     | C2                               | +0.015 (7)                    |
| P1                               | +0.039 (3)                     | C3                               | -0.024 (7)                    |
| P2                               | +0.039 (3)                     | C4                               | -0.068 (7)                    |
|                                  |                                | C5                               | -0.073 (7)                    |
|                                  |                                | C6                               | -0.034 (7)                    |

**Table S5.** Distances to the plane defined by Pt, S and P, in *trans-2*. Calculated using the program PLATON, values in Å. Pt is at the inversion center.

| Atoms defining the<br>plane | distances to the<br>plane | carbon atoms of<br>the sp ligand | distances to the<br>plane |
|-----------------------------|---------------------------|----------------------------------|---------------------------|
| Pt                          | 0                         | C1                               | 0.217 (7)                 |
| S                           | 0                         | C2                               | 0.146 (8)                 |
| P                           | 0                         | C3                               | 0.197 (8)                 |
|                             |                           | C4                               | 0.335 (8)                 |
|                             |                           | C5                               | 0.490 (8)                 |
|                             |                           | C6                               | 0.398 (8)                 |

**Table S6.** Distances to the least squares plane defined by Pt, S1, S2, P1 and P2, in *cis*-**2**·CH<sub>2</sub>Cl<sub>2</sub>. Calculated using the program PLATON, values in Å.

| Atoms defining the<br>l.s. plane | distances to the<br>l.s. plane | carbon atoms of<br>the sp ligand | distances to the<br>l.s. plane |
|----------------------------------|--------------------------------|----------------------------------|--------------------------------|
| Pt                               | 0.020 (1)                      | C11                              | 0.056 (17)                     |
| S1                               | 0.038 (5)                      | C12                              | 0.048 (13)                     |
| S2                               | 0.048 (5)                      | C13                              | 0.086 (16)                     |
| P1                               | 0.044 (3)                      | C14                              | 0.130 (2)                      |
| P2                               | 0.033 (3)                      | C15                              | 0.170 (2)                      |
|                                  |                                | C16                              | 0.130 (2)                      |
|                                  |                                | C21                              | -0.100 (16)                    |
|                                  |                                | C22                              | 0.021 (14)                     |
|                                  |                                | C23                              | 0.030 (17)                     |
|                                  |                                | C24                              | -0.100 (2)                     |
|                                  |                                | C25                              | -0.272 (17)                    |
|                                  |                                | C26                              | -0.235 (19)                    |
